# Supplementary material for: dBMHCC: A comprehensive hepatocellular carcinoma (HCC) biomarker database provides a reliable prediction system for novel HCC phosphorylated biomarkers
Source: PLOS journal article supplement (doi:10.1371/journal.pone.0234084), 2020-06-04
Supplement: S2 (10.1371/journal.pone.0234084.s002) [file journal.pone.0234084.s002]

**Table S1 Classification of subcellular localization evidence information obtained from Gene Ontology**

| <b>Experimental Evidence Code</b> | <b>Experimental Evidence Name</b>               | <b>Evidence Type<sup>a</sup></b> |
|-----------------------------------|-------------------------------------------------|----------------------------------|
| EXP                               | Inferred from Experiment                        | L1                               |
| IDA                               | Inferred from Direct Assay                      | L1                               |
| IPI                               | Inferred from Physical Interaction              | L1                               |
| IMP                               | Inferred from Mutant Phenotype                  | L1                               |
| IGI                               | Inferred from Genetic Interaction               | L1                               |
| IEP                               | Inferred from Expression Pattern                | L1                               |
| ISS                               | Inferred from Sequence or Structural Similarity | L2                               |
| ISO                               | Inferred from Sequence Orthology                | L2                               |
| ISA                               | Inferred from Sequence Alignment                | L2                               |
| ISM                               | Inferred from Sequence Model                    | L2                               |
| IGC                               | Inferred from Genomic Context                   | L2                               |
| IBA                               | Inferred from Biological aspect of Ancestor     | L2                               |
| IBD                               | Inferred from Biological aspect of Descendant   | L2                               |
| IKR                               | Inferred from Key Residues                      | L2                               |
| IRD                               | Inferred from Rapid Divergence                  | L2                               |
| RCA                               | inferred from Reviewed Computational Analysis   | L2                               |
| TAS                               | Traceable Author Statement                      | L3                               |
| NAS                               | Non-traceable Author Statement                  | L3                               |
| IC                                | Inferred by Curator                             | L4                               |
| ND                                | No biological Data available                    | L4                               |
| IEA                               | Inferred from Electronic Annotation             | L4                               |
| NR                                | Not Recorded                                    | L4                               |

<sup>a</sup> Evidence Type: L1, experimental evidence; L2, computational analysis evidence; L3, curatorial statement evidence; and L4, automatically-assigned evidence.
